# Supplementary material for: Epitope unmasking in vulvovaginal candidiasis is associated with hyphal growth and neutrophilic infiltration
Source: PubMed Central journal article supplement (PMC6067721; doi:10.1371/journal.pone.0201436), 2018-07-31
Supplement: pone.0201436.s001.pdf [file pone.0201436.s001.pdf]

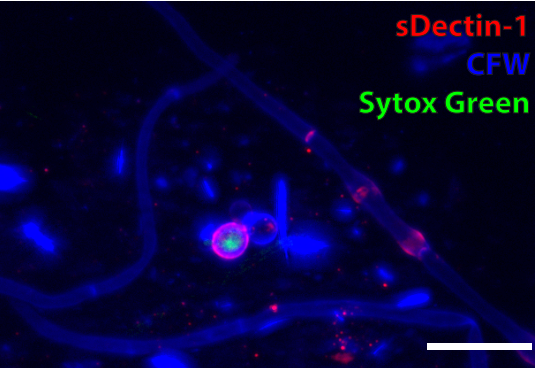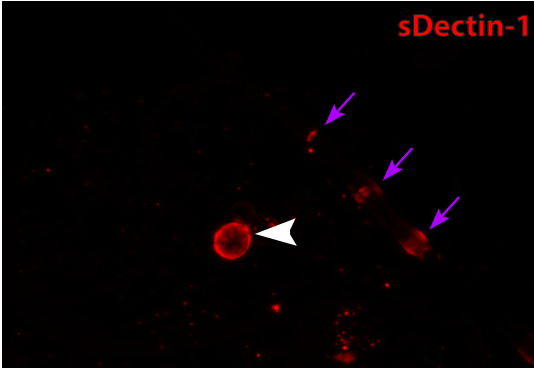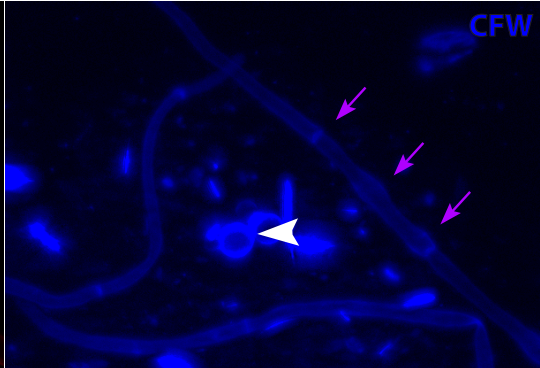

**Figure S1**
