# Supplementary material for: Epitope unmasking in vulvovaginal candidiasis is associated with hyphal growth and neutrophilic infiltration
Source: PubMed Central journal article supplement (PMC6067721; doi:10.1371/journal.pone.0201436), 2018-07-31
Supplement: pone.0201436.s002.pdf [file pone.0201436.s002.pdf]

**A**

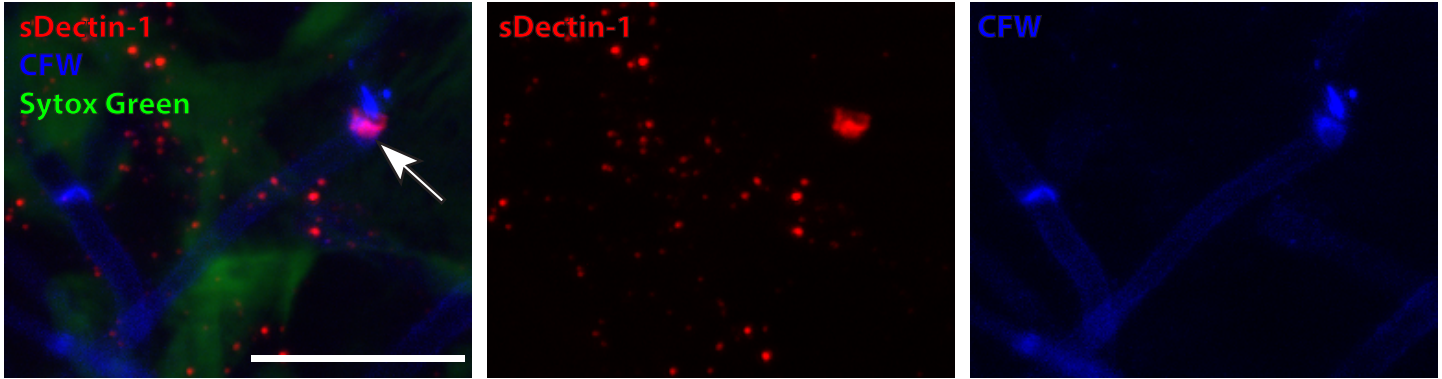

**B**

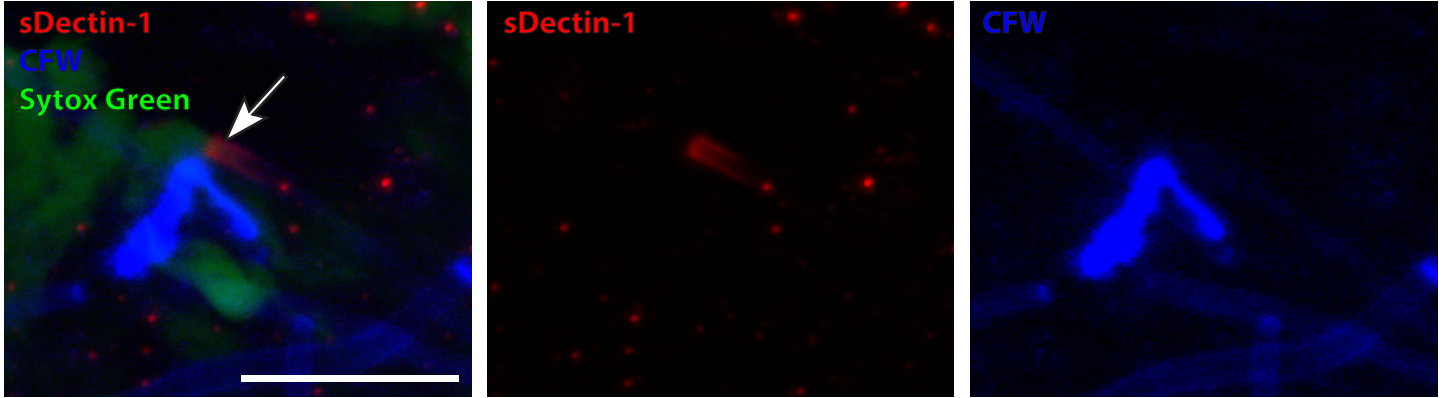

**Figure S2**
